# Supplementary material for: Nanoboxes with a porous MnO core and amorphous TiO2 shell as a mediator for lithium–sulfur batteries
Source: Royal Society of Chemistry journal article supplement (doi:10.1039/d0ta09700d), 2021-01-01
Supplement: d0ta09700d1.pdf [file d0ta09700d1.pdf]

## Electronic Supplementary Information

### Nanoboxes with Porous MnO Core and Amorphous TiO<sub>2</sub> Shell as Mediator for Lithium-Sulfur Battery

Jinhua Yang,<sup>1</sup> Xianfeng Yang,<sup>1</sup> Jian Liang Cheong,<sup>1</sup> Karim Zaghib,<sup>2</sup> Michel L. Trudeau,<sup>3</sup> and Jackie Y. Ying<sup>1\*</sup>

<sup>1</sup>NanoBio Lab, Agency for Science, Technology and Research, 31 Biopolis Way, The Nanos, Singapore 138669.

<sup>2</sup>Department of Mining and Materials Engineering, McGill University, 845 Sherbrooke Street West, Montréal, QC, Canada H3A 0G4.

<sup>3</sup>Center of Excellence in Transportation, Electrification and Energy Storage, Hydro-Québec, 1806 Bd. Lionel-Boulet, Varennes, QC, Canada J3X 1S1.

\*E-mail: [jyying@nbl.a-star.edu.sg](mailto:jyying@nbl.a-star.edu.sg).

**Table S1.** ICP-OES result of MnO@TiO<sub>2</sub> and MnO@TiO<sub>2</sub>/RGO-acid

| Sample                         | Ti    | Mn    | Ti:Mn Molar Ratio |
|--------------------------------|-------|-------|-------------------|
| MnO-TiO <sub>2</sub>           | 14.43 | 50.51 | 1:3.5             |
| MnO-TiO <sub>2</sub> /RGO-acid | 19.71 | 25.35 | 1:1.3             |

**Table S2.** Comparison of recent reports on sulfur host cathodes with MnO@TiO<sub>2</sub>/RGO-acid for Li-S battery.

| Host materials                           | Capacity (mAh/g) (current rate) | Cycling stability (%) (cycles, current rate) | Decay rate per cycle (%) | Reference |
|------------------------------------------|---------------------------------|----------------------------------------------|--------------------------|-----------|
| ZnS/NC                                   | 1232 (0.2 C)                    | 66.7% (200, 0.2 C)                           | 0.19                     | 1         |
| CoP@HCP                                  | 1058.2 (0.1 C)                  | 84.8% (200, 0.2 C)                           | 0.08                     | 2         |
| NiO-NiCo <sub>2</sub> O <sub>4</sub> @HC | 1063.2 (0.2 C)                  | 70.5% (500, 0.5 C)                           | 0.06                     | 3         |
| NiS@C-HS                                 | 1196 (0.1 C)                    | 72.0% (200, 0.2 C)                           | 0.14                     | 4         |
| MnO@TiO <sub>2</sub> /RGO-acid           | 1451 (0.1 C)                    | 74.3% (500, 0.5 C)                           | 0.05                     | This Work |

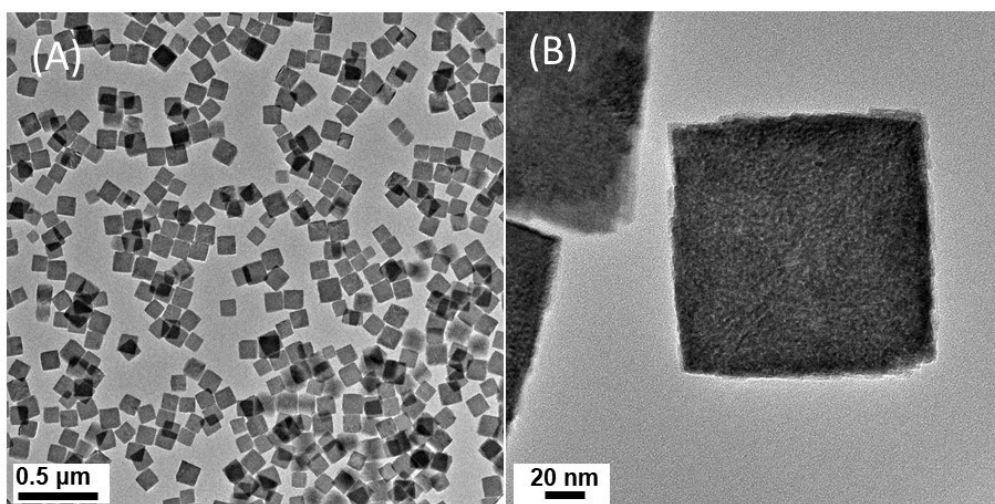

**Fig. S1.** (A) Low- and (B) high-magnification TEM images of  $\text{MnCO}_3$  nanocubes.

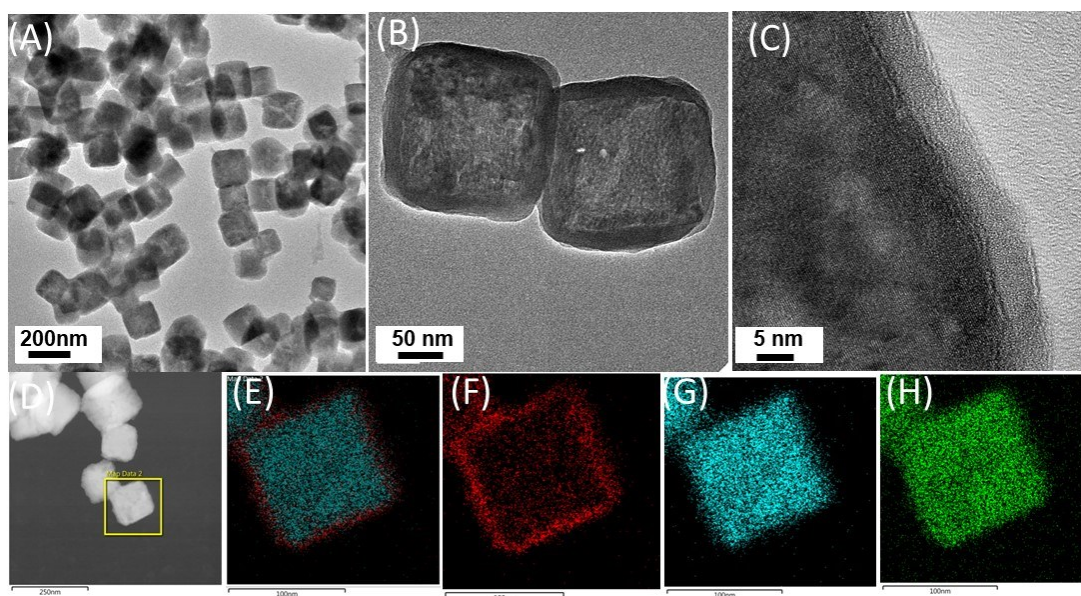

**Fig. S2.** (A) TEM, (B, C) HRTEM and (D) HAADF-STEM images of  $\text{MnCO}_3@TiO_2$  nanocubes. (E) Ti and Mn, (F) Ti, (G) Mn and (H) O EDX maps of the boxed  $\text{MnCO}_3@TiO_2$  nanocube in (D).

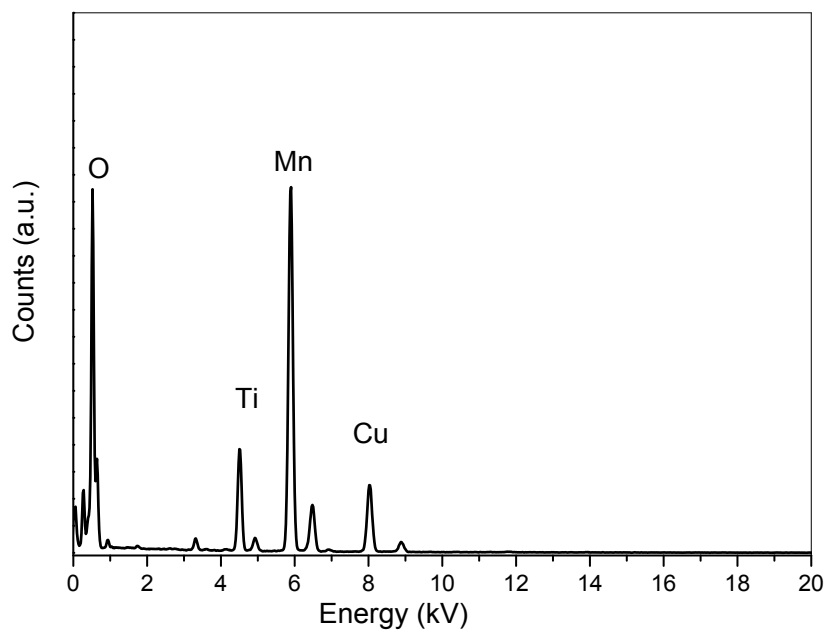

**Fig. S3.** EDX profile of MnO@TiO<sub>2</sub>. The Ti:Mn molar ratio was determined to be ~ 1:4.

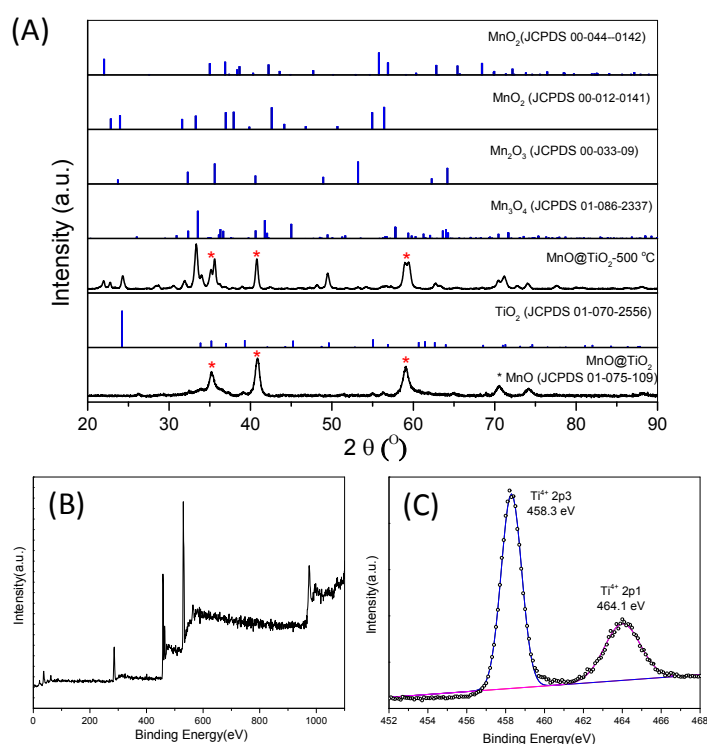

**Fig. S4.** (A) XRD pattern of MnO@TiO<sub>2</sub> annealed at 350°C and 500°C. After annealing at 500°C, MnO<sub>2</sub>, Mn<sub>2</sub>O<sub>3</sub> and Mn<sub>3</sub>O<sub>4</sub> phases were found besides MnO phase, and crystalline TiO<sub>2</sub> phase was also detected. (B, C) XPS spectra of MnO@TiO<sub>2</sub> (annealed at 350°C).

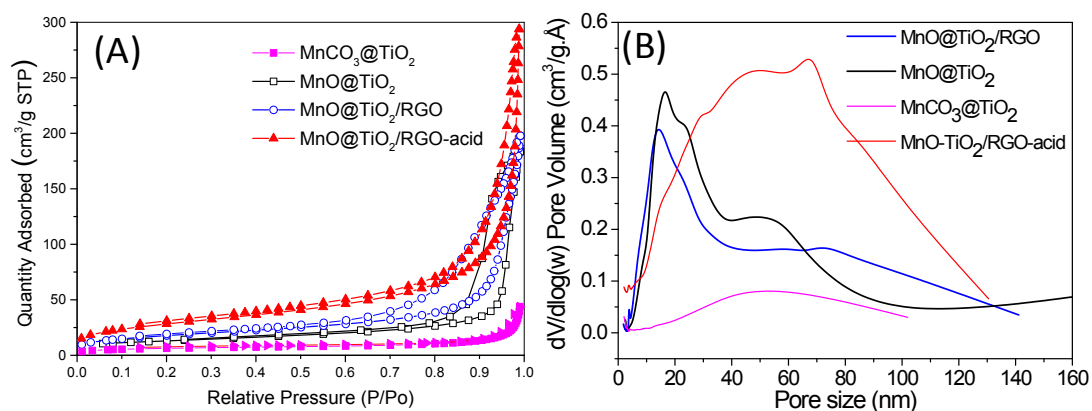

**Fig. S5.** (A)  $N_2$  adsorption/desorption isotherms and (B) pore size distribution curves of  $MnCO_3@TiO_2$ ,  $MnO@TiO_2$ ,  $MnO@TiO_2/RGO$  and  $MnO@TiO_2/RGO-acid$ .

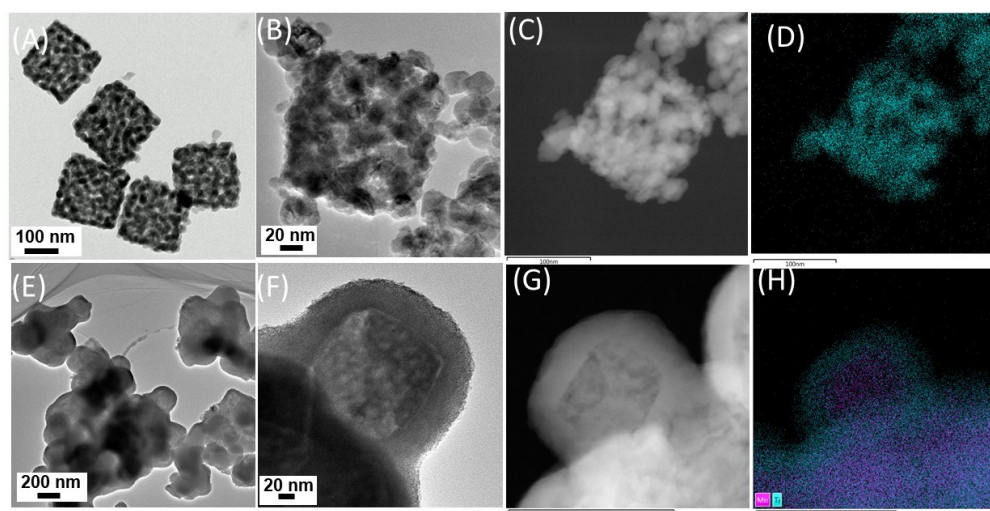

**Fig. S6.** (A, E) TEM and (B, F) HRTEM images, (C, G) HAADF-STEM images and (D, H) EDX elemental maps of (A–D) MnO and (E–H)  $MnO@TiO_2$  synthesized with 1.5 mL of Ti(IV) butoxide.

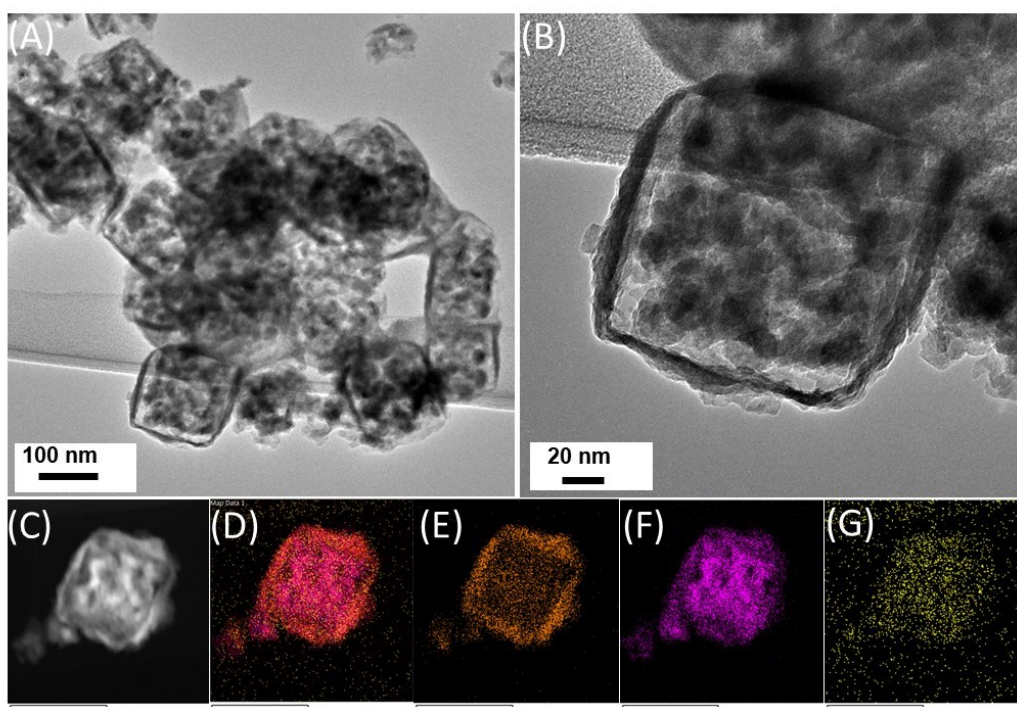

**Fig. S7.** (A) TEM, (B) HRTEM and (C) HAADF-STEM images of MnO@TiO<sub>2</sub>-S nanocomposites. (D) Ti and Mn, (E) Ti, (F) Mn and (G) O EDX maps of the MnO@TiO<sub>2</sub>-S nanocomposite in (C).

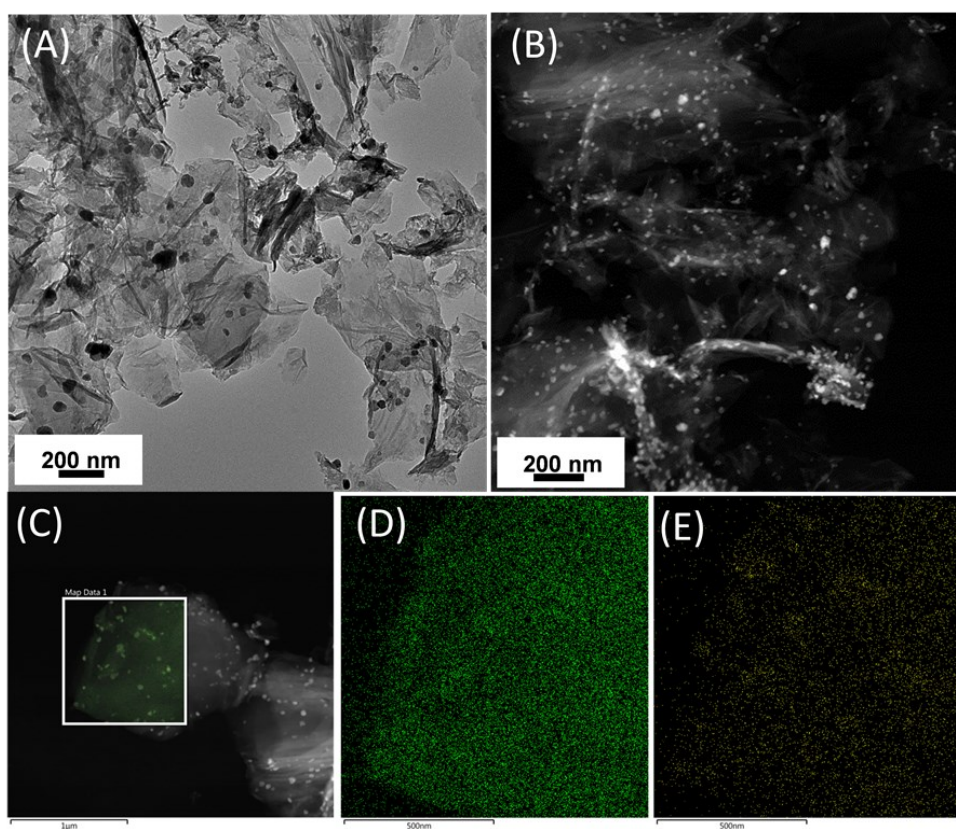

**Fig. S8.** (A) TEM and (B, C) HAADF-STEM images of RGO-S nanocomposites. (D) C and (E) S maps of the boxed RGO-S nanocomposites in (C).

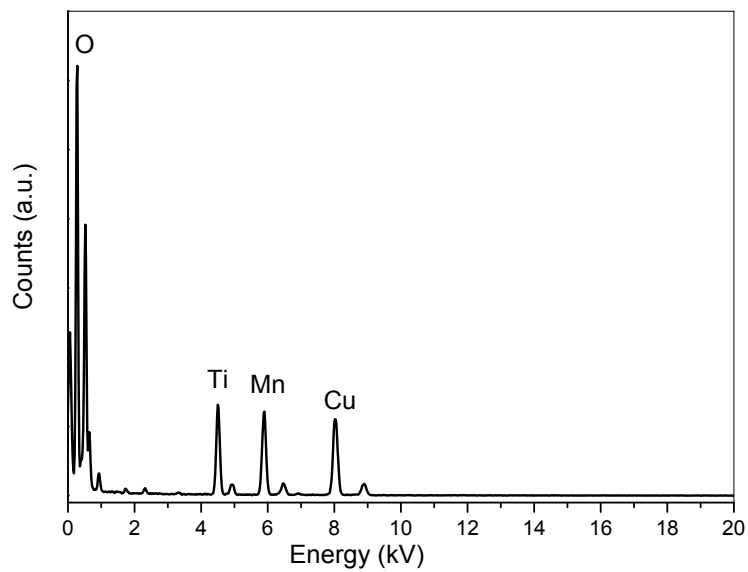

**Fig. S9.** EDX profile of MnO@TiO<sub>2</sub>/RGO-acid. The Ti:Mn molar ratio was determined to be ~ 1:1.

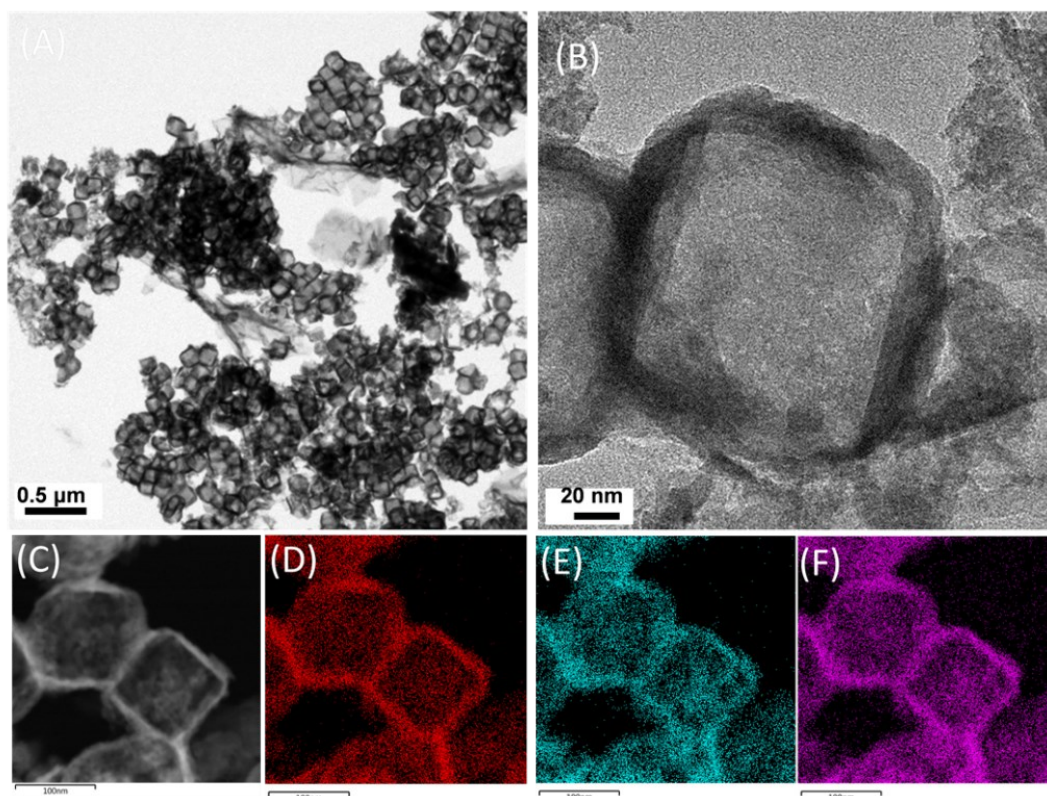

**Fig. S10.** (A) Low- and (B) high-magnification TEM, and (C) HAADF-STEM images of MnO@TiO<sub>2</sub>/RGO-acid nanocomposites. (D) Ti, (E) Mn and (F) O EDX maps of the MnO@TiO<sub>2</sub>/RGO-acid nanocomposites in (C).

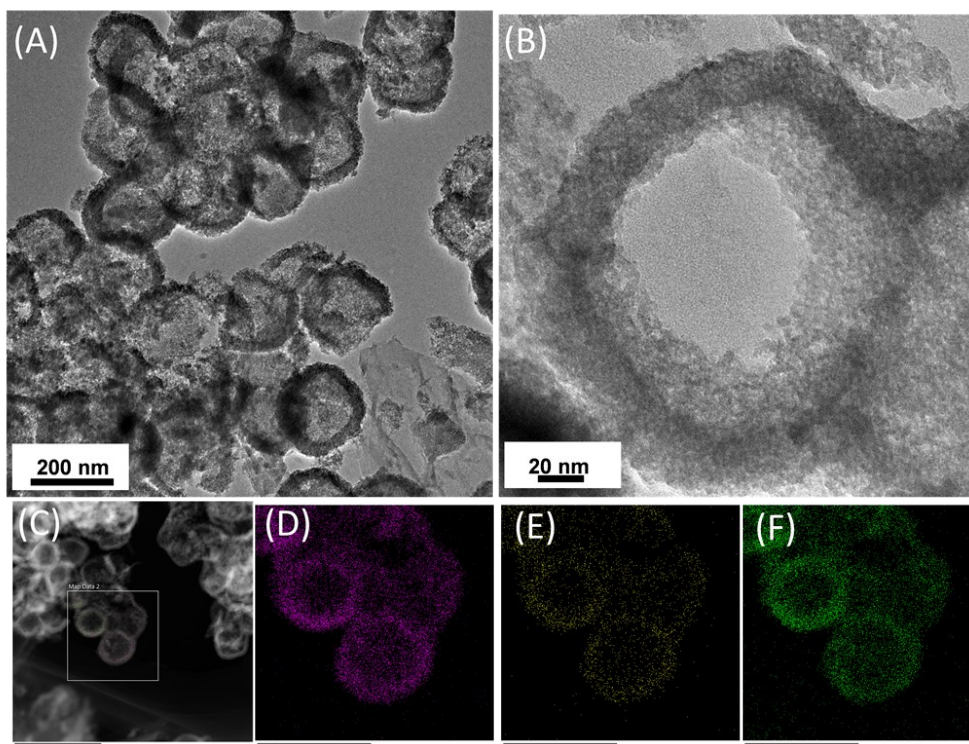

**Fig. S11.** (A) Low- and (B) high-magnification TEM, and (C) HAADF-STEM images of MnO@TiO<sub>2</sub>/RGO-acid-hollow nanocomposites obtained with 24 h of reaction. (D) Ti, (E) Mn and (F) O maps of the boxed MnO@TiO<sub>2</sub>/RGO-acid-hollow nanocomposites in (C).

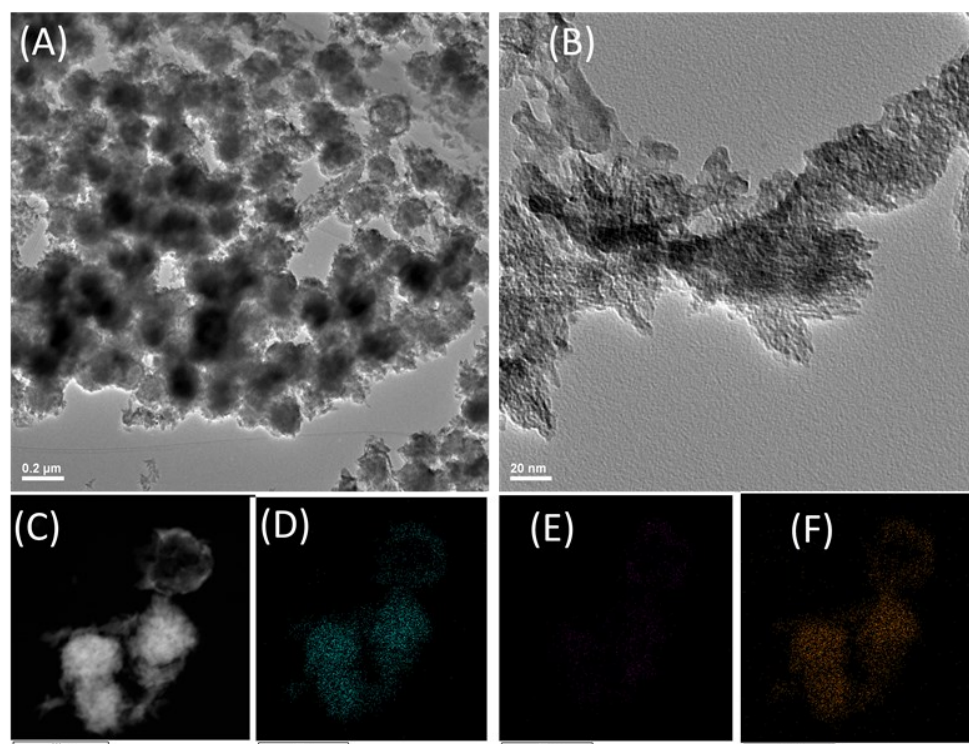

**Fig. S12.** (A) Low- and (B) high-magnification TEM, and (C) HAADF-STEM images of MnO@TiO<sub>2</sub>/RGO-acid-72h nanocomposites. (D) Ti, (E) Mn and (F) O maps of the MnO@TiO<sub>2</sub>/RGO-acid-72h nanocomposites in (C).

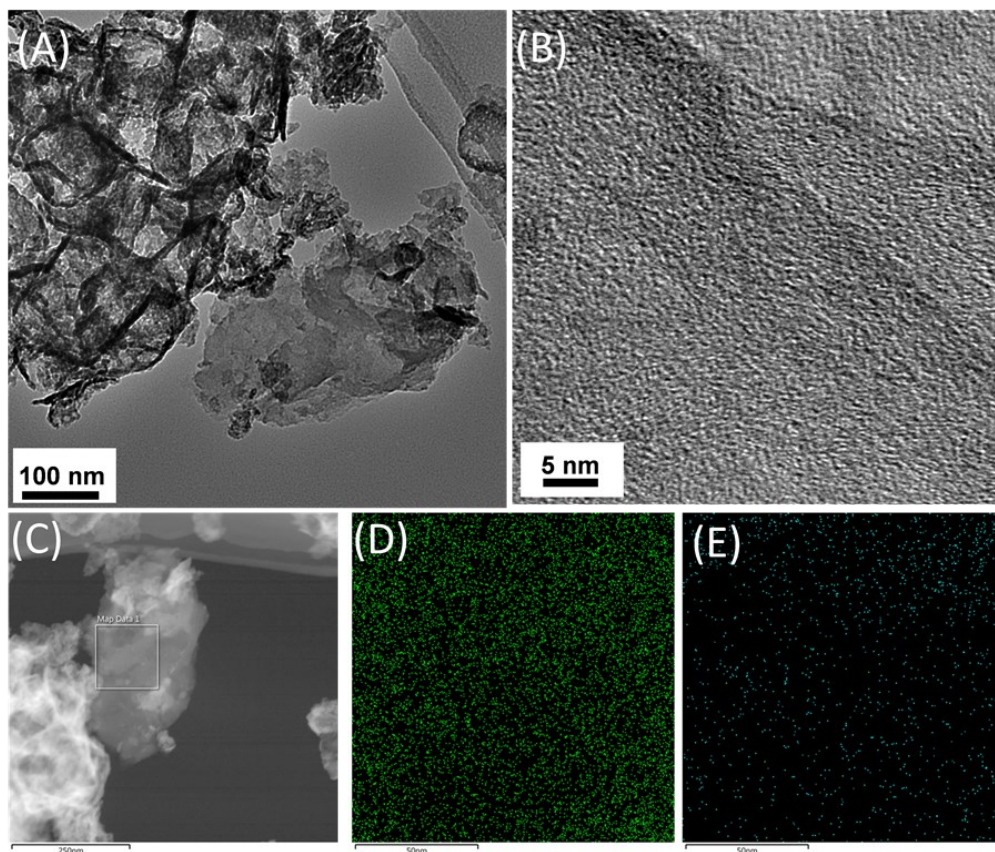

**Fig. S13.** (A) TEM, (B) HRTEM and (C) HAADF-STEM images of MnO@TiO<sub>2</sub>/RGO-acid-S nanocomposites. (D) C and (E) S maps of the boxed MnO@TiO<sub>2</sub>/RGO-acid-S nanocomposites in (C).

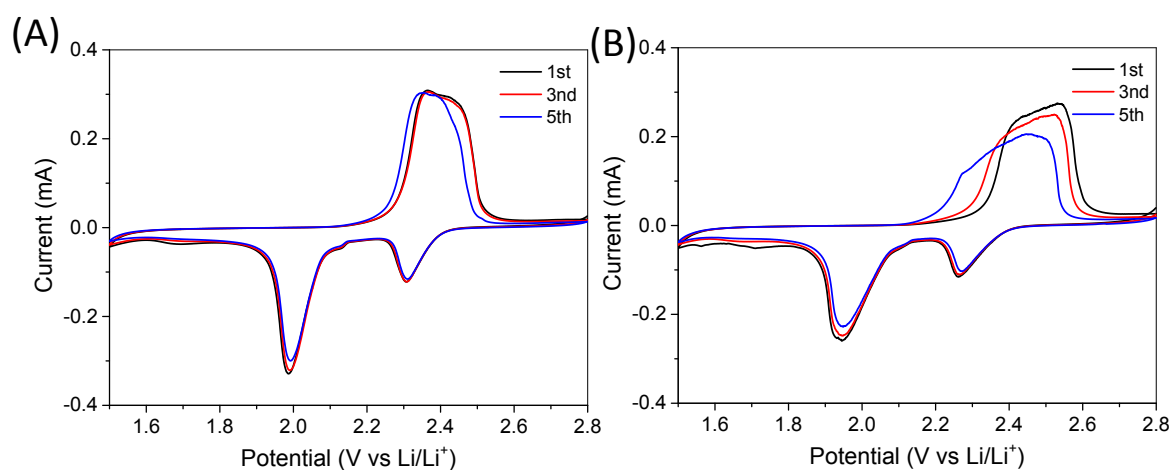

**Fig. S14.** CV profiles of (A) MnO@TiO<sub>2</sub>/RGO-S and (B) MnO@TiO<sub>2</sub>-S. A scan rate of 0.05 mV/S was used over a potential range of 1.5–2.8 V (versus Li/Li<sup>+</sup>).



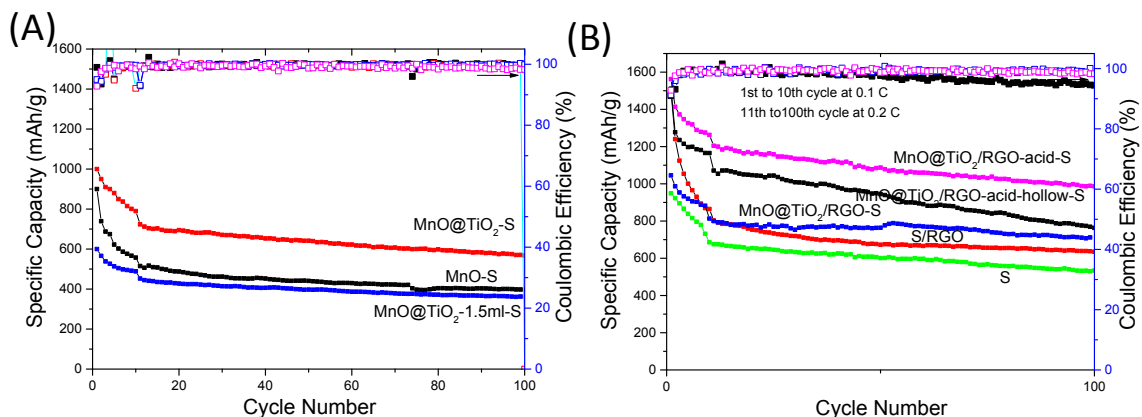

**Fig. S15.** (A) Cycling performance of MnO-S, and MnO@TiO<sub>2</sub>-S and MnO@TiO<sub>2</sub>-1.5ml-S nanocomposites at room temperature. (B) Cycling performance of MnO@TiO<sub>2</sub>/RGO-S, MnO@TiO<sub>2</sub>/RGO-acid-S and MnO@TiO<sub>2</sub>/RGO-acid-hollow-S nanocomposites, S/RGO, and S nanocrystals at room temperature. Closed square: specific capacity; open square: Coulombic efficiency.

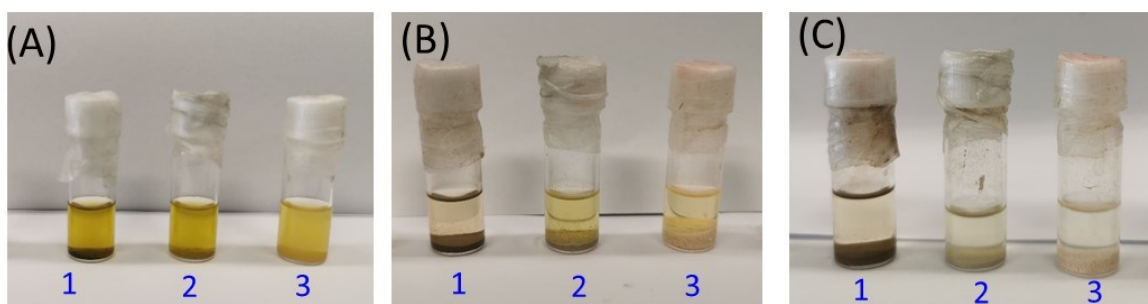

**Fig. S16.** Photographs of Li<sub>2</sub>S<sub>6</sub> solution with DOL/DME solvent (A) before, and (B) 3 h and (C) 12 h after introducing (1) MnO nanoparticles, (2) amorphous TiO<sub>2</sub>, and (3) commercial crystalline TiO<sub>2</sub>.

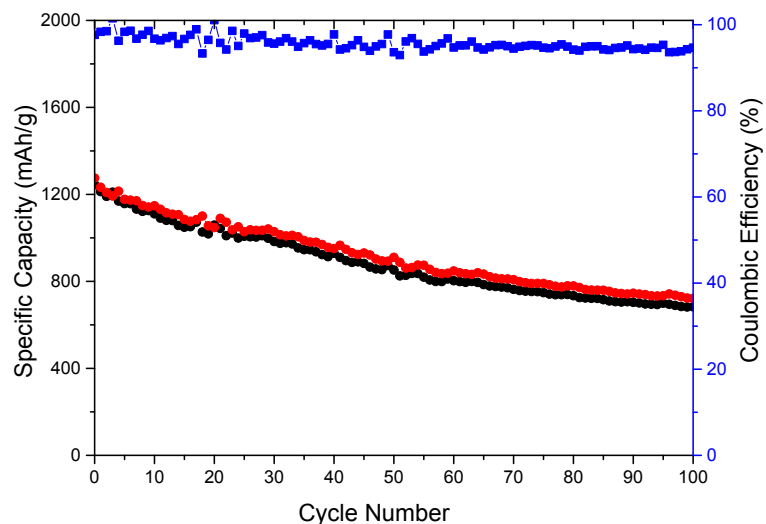

**Fig. S17.** Cycling performance of MnO@TiO<sub>2</sub>-acid-S nanocomposites with 3 mg/cm<sup>2</sup> sulfur loading at room temperature: specific capacity at 0.2 C during (●) charging and (●) discharging, and Coulombic efficiency (■).

## References

1. W. Li, Z. Gong, X. Yan, D. Wang, J. Liu, X. Guo, Z. Zhang, G. Li, *J. Mater. Chem. A* **2020**, *8*, 433–442.
2. Z. Ye, Y. Jiang, J. Qian, W. Li, T. Feng, L. Li, F. Wu, R. Chen, *Nano Energy* **2019**, *64*, 103965.
3. L. Hu, C. Dai, H. Liu, Y. Li, B. Shen, Y. Chen, S. Bao, M. Xu, *Adv. Energy Mater.* **2018**, *8*, 1800709.
4. C. Ye, L. Zhang, C. Guo, D. Li, A. Vasileff, H. Wang, S. Qiao, *Adv. Funct. Mater.* **2017**, *27*, 1702524.
